# Supplementary material for: Development of a force field for ATP – how charge scaling controls self-association
Source: Royal Society of Chemistry journal article supplement (doi:10.1039/d4cp04270k), 2025-01-01
Supplement: d4cp04270k1.pdf [file d4cp04270k1.pdf]

## SUPPLEMENTARY INFORMATION

### Development of a Force Field for ATP – How Charge Scaling Controls Self Association

Tuan Minh Do,<sup>\*a,b</sup> Nobuyuki Matubayasi,<sup>b</sup> and Dominik Horinek<sup>\*a</sup>

<sup>a</sup>*Institute of Physical and Theoretical Chemistry, University of Regensburg, 93040 Regensburg, Germany. E-mail: dominik.horinek@ur.de*

<sup>b</sup>*Division of Chemical Engineering, Graduate School of Engineering Science, Osaka University, 560-8531 Toyonaka, Osaka, Japan. E-mail: do.minh@cheng.es.osaka-u.ac.jp*

Figure S1

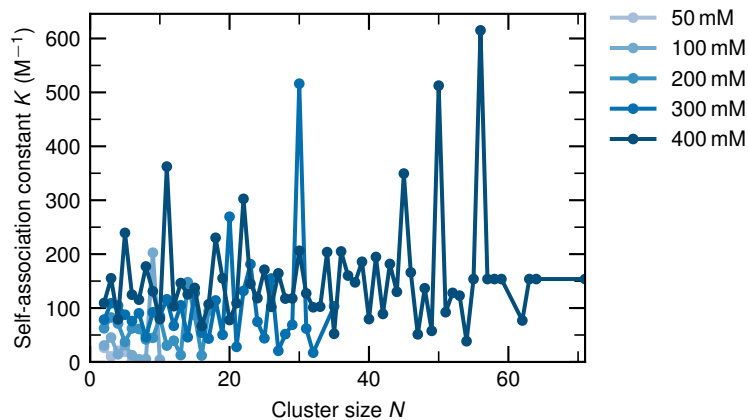

Figure 1: **Cluster-size dependent self-association constant  $K(N)$ .**  $K(N)$  shows strong fluctuations as a function of  $N$ , making the direct application of Eq. (2) infeasible for comparison with experimental values. To address this, we employed an isodesmic model, which simplifies the analysis by assuming that  $K$  depends only on the total ATP concentration and the number of clusters.

## System topology file topol.top

```
1 ; GROMACS topology
2
3 ; Include the force field
4 #include "amber03w.ff/forcefield.itp"
5
6 [ atomtypes ]
7 ; name      at.num  mass      charge ptype  sigma      epsilon
8 O3          8        15.99940  0.0000  A   3.11690e-01  8.78640e-01 ; Steinbrecher et al., JChemTheory, 2012
9 O2          8        15.99940  0.0000  A   3.11690e-01  8.78640e-01 ; Steinbrecher et al., JChemTheory, 2012
10 OQ          8        15.99940  0.0000  A   3.22345e-01  8.78640e-01 ; Steinbrecher et al., JChemTheory, 2012
11 OR          8        15.99940  0.0000  A   3.15699e-01  7.11280e-01 ; Steinbrecher et al., JChemTheory, 2012
12 OWAT       8        15.99940  0.0000  A   3.15890e-01  7.74903e-01 ; Tip4p/2005
13 HWAT       1         1.00800  0.5564  A   0.00000e+00  0.00000e+00 ; Tip4p/2005
14 MWAT       0         0.00000 -1.1128  D   0.00000e+00  0.00000e+00 ; Tip4p/2005
15
16 ; Include ion topologies
17 #include "atp.itp"
18 #include "ions.itp"
19
20 ; Include water topology
21 #include "tip4p2005.itp"
22
23 [ system ]
24 SYSTEMNAME
25
26 [ molecules ]
```

# ATP topology file atp.itp

```

1 ; ATP adenosin triphosphate
2
3 [ moleculetype ]
4 ;name                nrexcl
5 ATP                    3
6
7 [ atoms ]
8 ;nr   type  resnr  res   atom  cgnr      charge      mass ; qtot
9 1     O3    1      atp   O1G   1      -0.666820    16.000000 ; qtot -0.666820
10 2     P     1      atp   PG    2       0.885500    30.970000 ; qtot  0.218680
11 3     O3    1      atp   O2G   3      -0.666820    16.000000 ; qtot -0.448140
12 4     O3    1      atp   O3G   4      -0.666820    16.000000 ; qtot -1.114960
13 5     OR    1      atp   O3B   5      -0.372540    16.000000 ; qtot -1.487500
14 6     P     1      atp   PB    6       0.969640    30.970000 ; qtot -0.517860
15 7     O2    1      atp   O1B   7      -0.622580    16.000000 ; qtot -1.140440
16 8     O2    1      atp   O2B   8      -0.622580    16.000000 ; qtot -1.763020
17 9     OR    1      atp   O3A   9      -0.398230    16.000000 ; qtot -2.161250
18 10    P     1      atp   PA   10      0.877240    30.970000 ; qtot -1.284010
19 11    O2    1      atp   O1A  11      -0.615930    16.000000 ; qtot -1.899940
20 12    O2    1      atp   O2A  12      -0.615930    16.000000 ; qtot -2.515870
21 13    OR    1      atp   O5*  13      -0.476930    16.000000 ; qtot -2.992800
22 14    CT    1      atp   C5*  14       0.055800    12.010000 ; qtot -2.937000
23 15    H1    1      atp   H50  15       0.067900     1.008000 ; qtot -2.869100
24 16    H1    1      atp   H51  16       0.067900     1.008000 ; qtot -2.801200
25 17    CT    1      atp   C4*  17       0.106500    12.010000 ; qtot -2.694700
26 18    H1    1      atp   H40  18       0.117400     1.008000 ; qtot -2.577300
27 19    OS    1      atp   O4*  19      -0.354800    16.000000 ; qtot -2.932100
28 20    CT    1      atp   C1*  20       0.039400    12.010000 ; qtot -2.892700
29 21    H2    1      atp   H10  21       0.200700     1.008000 ; qtot -2.692000
30 22    N*    1      atp   N9   22      -0.025100    14.010000 ; qtot -2.717100
31 23    CK    1      atp   C8   23       0.200600    12.010000 ; qtot -2.516500
32 24    H5    1      atp   H80  24       0.155300     1.008000 ; qtot -2.361200
33 25    NB    1      atp   N7   25      -0.607300    14.010000 ; qtot -2.968500
34 26    CB    1      atp   C5   26       0.051500    12.010000 ; qtot -2.917000
35 27    CA    1      atp   C6   27       0.700900    12.010000 ; qtot -2.216100
36 28    N2    1      atp   N6   28      -0.901900    14.010000 ; qtot -3.118000
37 29    H     1      atp   H60  29       0.411500     1.008000 ; qtot -2.706500
38 30    H     1      atp   H61  30       0.411500     1.008000 ; qtot -2.295000
39 31    NC    1      atp   N1   31      -0.761500    14.010000 ; qtot -3.056500
40 32    CQ    1      atp   C2   32       0.587500    12.010000 ; qtot -2.469000
41 33    H5    1      atp   H2   33       0.047300     1.008000 ; qtot -2.421700
42 34    NC    1      atp   N3   34      -0.699700    14.010000 ; qtot -3.121400
43 35    CB    1      atp   C4   35       0.305300    12.010000 ; qtot -2.816100
44 36    CT    1      atp   C3*  36       0.202200    12.010000 ; qtot -2.613900
45 37    H1    1      atp   H30  37       0.061500     1.008000 ; qtot -2.552400
46 38    OH    1      atp   O3*  38      -0.654100    16.000000 ; qtot -3.206500
47 39    HO    1      atp   H3'  39       0.437600     1.008000 ; qtot -2.768900
48 40    CT    1      atp   C2*  40       0.067000    12.010000 ; qtot -2.701900
49 41    H1    1      atp   H20  41       0.097200     1.008000 ; qtot -2.604700
50 42    OH    1      atp   O2*  42      -0.613900    16.000000 ; qtot -3.218600
51 43    HO    1      atp   H2'  43       0.418600     1.008000 ; qtot -2.800000
52
53 [ bonds ]
54 ;ai   aj      funct      r      k
55 42    43      1          9.600000e-02  4.627504e+05 ; O2*-H2'
56 40    41      1          1.090000e-01  2.845120e+05 ; C2*-H2O
57 38    39      1          9.600000e-02  4.627504e+05 ; O3*-H3'

```

|    |    |    |   |              |              |           |
|----|----|----|---|--------------|--------------|-----------|
| 58 | 36 | 37 | 1 | 1.090000e-01 | 2.845120e+05 | ; C3*-H30 |
| 59 | 32 | 33 | 1 | 1.080000e-01 | 3.071056e+05 | ; C2-H2   |
| 60 | 28 | 29 | 1 | 1.010000e-01 | 3.631712e+05 | ; N6-H60  |
| 61 | 28 | 30 | 1 | 1.010000e-01 | 3.631712e+05 | ; N6-H61  |
| 62 | 23 | 24 | 1 | 1.080000e-01 | 3.071056e+05 | ; C8-H80  |
| 63 | 20 | 21 | 1 | 1.090000e-01 | 2.845120e+05 | ; C1*-H10 |
| 64 | 17 | 18 | 1 | 1.090000e-01 | 2.845120e+05 | ; C4*-H40 |
| 65 | 14 | 15 | 1 | 1.090000e-01 | 2.845120e+05 | ; C5*-H50 |
| 66 | 14 | 16 | 1 | 1.090000e-01 | 2.845120e+05 | ; C5*-H51 |
| 67 | 40 | 42 | 1 | 1.410000e-01 | 2.677760e+05 | ; C2*-O2* |
| 68 | 36 | 38 | 1 | 1.410000e-01 | 2.677760e+05 | ; C3*-O3* |
| 69 | 36 | 40 | 1 | 1.526000e-01 | 2.594080e+05 | ; C3*-C2* |
| 70 | 34 | 35 | 1 | 1.354000e-01 | 3.857648e+05 | ; N3-C4   |
| 71 | 32 | 34 | 1 | 1.324000e-01 | 4.200736e+05 | ; C2-N3   |
| 72 | 31 | 32 | 1 | 1.324000e-01 | 4.200736e+05 | ; N1-C2   |
| 73 | 27 | 28 | 1 | 1.340000e-01 | 4.025008e+05 | ; C6-N6   |
| 74 | 27 | 31 | 1 | 1.339000e-01 | 4.041744e+05 | ; C6-N1   |
| 75 | 26 | 27 | 1 | 1.404000e-01 | 3.924592e+05 | ; C5-C6   |
| 76 | 26 | 35 | 1 | 1.370000e-01 | 4.351360e+05 | ; C5-C4   |
| 77 | 25 | 26 | 1 | 1.391000e-01 | 3.464352e+05 | ; N7-C5   |
| 78 | 23 | 25 | 1 | 1.304000e-01 | 4.426672e+05 | ; C8-N7   |
| 79 | 22 | 23 | 1 | 1.371000e-01 | 3.681920e+05 | ; N9-C8   |
| 80 | 22 | 35 | 1 | 1.374000e-01 | 3.648448e+05 | ; N9-C4   |
| 81 | 20 | 22 | 1 | 1.475000e-01 | 2.820016e+05 | ; C1*-N9  |
| 82 | 20 | 40 | 1 | 1.526000e-01 | 2.594080e+05 | ; C1*-C2* |
| 83 | 19 | 20 | 1 | 1.410000e-01 | 2.677760e+05 | ; O4*-C1* |
| 84 | 17 | 19 | 1 | 1.410000e-01 | 2.677760e+05 | ; C4*-O4* |
| 85 | 17 | 36 | 1 | 1.526000e-01 | 2.594080e+05 | ; C4*-C3* |
| 86 | 14 | 17 | 1 | 1.526000e-01 | 2.594080e+05 | ; C5*-C4* |
| 87 | 13 | 14 | 1 | 1.410000e-01 | 2.677760e+05 | ; O5*-C5* |
| 88 | 10 | 11 | 1 | 1.480000e-01 | 4.393200e+05 | ; PA-O1A  |
| 89 | 10 | 12 | 1 | 1.480000e-01 | 4.393200e+05 | ; PA-O2A  |
| 90 | 10 | 13 | 1 | 1.610000e-01 | 1.924640e+05 | ; PA-O5*  |
| 91 | 9  | 10 | 1 | 1.610000e-01 | 1.924640e+05 | ; O3A-PA  |
| 92 | 6  | 7  | 1 | 1.480000e-01 | 4.393200e+05 | ; PB-O1B  |
| 93 | 6  | 8  | 1 | 1.480000e-01 | 4.393200e+05 | ; PB-O2B  |
| 94 | 6  | 9  | 1 | 1.610000e-01 | 1.924640e+05 | ; PB-O3A  |
| 95 | 5  | 6  | 1 | 1.610000e-01 | 1.924640e+05 | ; O3B-PB  |
| 96 | 2  | 3  | 1 | 1.480000e-01 | 4.393200e+05 | ; PG-O2G  |
| 97 | 2  | 4  | 1 | 1.480000e-01 | 4.393200e+05 | ; PG-O3G  |
| 98 | 2  | 5  | 1 | 1.610000e-01 | 1.924640e+05 | ; PG-O3B  |
| 99 | 1  | 2  | 1 | 1.480000e-01 | 4.393200e+05 | ; O1G-PG  |

100

101 [ pairs ]

| 102 | ;ai | aj | funct |           |
|-----|-----|----|-------|-----------|
| 103 | 41  | 43 | 1     | ; H20-H2' |
| 104 | 39  | 40 | 1     | ; H3'-C2* |
| 105 | 38  | 41 | 1     | ; O3*-H20 |
| 106 | 37  | 39 | 1     | ; H30-H3' |
| 107 | 37  | 41 | 1     | ; H30-H20 |
| 108 | 37  | 42 | 1     | ; H30-O2* |
| 109 | 36  | 43 | 1     | ; C3*-H2' |
| 110 | 33  | 35 | 1     | ; H2-C4   |
| 111 | 30  | 31 | 1     | ; H61-N1  |
| 112 | 29  | 31 | 1     | ; H60-N1  |
| 113 | 27  | 33 | 1     | ; C6-H2   |
| 114 | 26  | 29 | 1     | ; C5-H60  |
| 115 | 26  | 30 | 1     | ; C5-H61  |
| 116 | 24  | 35 | 1     | ; H80-C4  |

|     |    |    |   |           |
|-----|----|----|---|-----------|
| 117 | 24 | 26 | 1 | ; H80-C5  |
| 118 | 22 | 41 | 1 | ; N9-H20  |
| 119 | 21 | 23 | 1 | ; H10-C8  |
| 120 | 21 | 35 | 1 | ; H10-C4  |
| 121 | 21 | 36 | 1 | ; H10-C3* |
| 122 | 21 | 41 | 1 | ; H10-H20 |
| 123 | 21 | 42 | 1 | ; H10-02* |
| 124 | 20 | 24 | 1 | ; C1*-H80 |
| 125 | 20 | 37 | 1 | ; C1*-H30 |
| 126 | 20 | 43 | 1 | ; C1*-H2' |
| 127 | 19 | 37 | 1 | ; 04*-H30 |
| 128 | 19 | 41 | 1 | ; 04*-H20 |
| 129 | 18 | 20 | 1 | ; H40-C1* |
| 130 | 18 | 37 | 1 | ; H40-H30 |
| 131 | 18 | 38 | 1 | ; H40-03* |
| 132 | 18 | 40 | 1 | ; H40-C2* |
| 133 | 17 | 21 | 1 | ; C4*-H10 |
| 134 | 17 | 39 | 1 | ; C4*-H3' |
| 135 | 17 | 41 | 1 | ; C4*-H20 |
| 136 | 16 | 18 | 1 | ; H51-H40 |
| 137 | 16 | 19 | 1 | ; H51-04* |
| 138 | 16 | 36 | 1 | ; H51-C3* |
| 139 | 15 | 18 | 1 | ; H50-H40 |
| 140 | 15 | 19 | 1 | ; H50-04* |
| 141 | 15 | 36 | 1 | ; H50-C3* |
| 142 | 14 | 37 | 1 | ; C5*-H30 |
| 143 | 13 | 18 | 1 | ; 05*-H40 |
| 144 | 10 | 15 | 1 | ; PA-H50  |
| 145 | 10 | 16 | 1 | ; PA-H51  |
| 146 | 38 | 42 | 1 | ; 03*-02* |
| 147 | 35 | 40 | 1 | ; C4-C2*  |
| 148 | 31 | 35 | 1 | ; N1-C4   |
| 149 | 28 | 35 | 1 | ; N6-C4   |
| 150 | 28 | 32 | 1 | ; N6-C2   |
| 151 | 27 | 34 | 1 | ; C6-N3   |
| 152 | 26 | 32 | 1 | ; C5-C2   |
| 153 | 25 | 28 | 1 | ; N7-N6   |
| 154 | 25 | 31 | 1 | ; N7-N1   |
| 155 | 25 | 34 | 1 | ; N7-N3   |
| 156 | 23 | 40 | 1 | ; C8-C2*  |
| 157 | 23 | 34 | 1 | ; C8-N3   |
| 158 | 23 | 27 | 1 | ; C8-C6   |
| 159 | 22 | 36 | 1 | ; N9-C3*  |
| 160 | 22 | 42 | 1 | ; N9-02*  |
| 161 | 22 | 32 | 1 | ; N9-C2   |
| 162 | 22 | 27 | 1 | ; N9-C6   |
| 163 | 20 | 25 | 1 | ; C1*-N7  |
| 164 | 20 | 34 | 1 | ; C1*-N3  |
| 165 | 20 | 26 | 1 | ; C1*-C5  |
| 166 | 20 | 38 | 1 | ; C1*-03* |
| 167 | 19 | 38 | 1 | ; 04*-03* |
| 168 | 19 | 23 | 1 | ; 04*-C8  |
| 169 | 19 | 35 | 1 | ; 04*-C4  |
| 170 | 19 | 42 | 1 | ; 04*-02* |
| 171 | 17 | 22 | 1 | ; C4*-N9  |
| 172 | 17 | 42 | 1 | ; C4*-02* |
| 173 | 14 | 20 | 1 | ; C5*-C1* |
| 174 | 14 | 38 | 1 | ; C5*-03* |
| 175 | 14 | 40 | 1 | ; C5*-C2* |

```

176 13      19      1      ; 05*-04*
177 13      36      1      ; 05*-C3*
178 12      14      1      ; 02A-C5*
179 11      14      1      ; 01A-C5*
180 10      17      1      ; PA-C4*
181 9       14      1      ; 03A-C5*
182 8       10      1      ; 02B-PA
183 7       10      1      ; 01B-PA
184 6       11      1      ; PB-01A
185 6       12      1      ; PB-02A
186 6       13      1      ; PB-05*
187 5       10      1      ; 03B-PA
188 4       6       1      ; 03G-PB
189 3       6       1      ; 02G-PB
190 2       7       1      ; PG-01B
191 2       8       1      ; PG-02B
192 2       9       1      ; PG-03A
193 1       6       1      ; 01G-PB

```

```

194
195 [ angles ]

```

|     | ai | aj | ak | funct | theta        | cth          |               |
|-----|----|----|----|-------|--------------|--------------|---------------|
| 196 | 41 | 40 | 42 | 1     | 1.095000e+02 | 4.184000e+02 | ; H20-C2*-02* |
| 197 | 40 | 42 | 43 | 1     | 1.085000e+02 | 4.602400e+02 | ; C2*-02*-H2' |
| 198 | 37 | 36 | 38 | 1     | 1.095000e+02 | 4.184000e+02 | ; H30-C3*-03* |
| 199 | 37 | 36 | 40 | 1     | 1.095000e+02 | 4.184000e+02 | ; H30-C3*-C2* |
| 200 | 36 | 38 | 39 | 1     | 1.085000e+02 | 4.602400e+02 | ; C3*-03*-H3' |
| 201 | 36 | 40 | 41 | 1     | 1.095000e+02 | 4.184000e+02 | ; C3*-C2*-H20 |
| 202 | 33 | 32 | 34 | 1     | 1.154500e+02 | 4.184000e+02 | ; H2-C2-N3    |
| 203 | 31 | 32 | 33 | 1     | 1.154500e+02 | 4.184000e+02 | ; N1-C2-H2    |
| 204 | 29 | 28 | 30 | 1     | 1.200001e+02 | 2.928800e+02 | ; H60-N6-H61  |
| 205 | 27 | 28 | 29 | 1     | 1.200001e+02 | 4.184000e+02 | ; C6-N6-H60   |
| 206 | 27 | 28 | 30 | 1     | 1.200001e+02 | 4.184000e+02 | ; C6-N6-H61   |
| 207 | 24 | 23 | 25 | 1     | 1.230501e+02 | 4.184000e+02 | ; H80-C8-N7   |
| 208 | 22 | 23 | 24 | 1     | 1.230501e+02 | 4.184000e+02 | ; N9-C8-H80   |
| 209 | 21 | 20 | 22 | 1     | 1.095000e+02 | 4.184000e+02 | ; H10-C1*-N9  |
| 210 | 21 | 20 | 40 | 1     | 1.095000e+02 | 4.184000e+02 | ; H10-C1*-C2* |
| 211 | 20 | 40 | 41 | 1     | 1.095000e+02 | 4.184000e+02 | ; C1*-C2*-H20 |
| 212 | 19 | 20 | 21 | 1     | 1.095000e+02 | 4.184000e+02 | ; 04*-C1*-H10 |
| 213 | 18 | 17 | 19 | 1     | 1.095000e+02 | 4.184000e+02 | ; H40-C4*-04* |
| 214 | 18 | 17 | 36 | 1     | 1.095000e+02 | 4.184000e+02 | ; H40-C4*-C3* |
| 215 | 17 | 36 | 37 | 1     | 1.095000e+02 | 4.184000e+02 | ; C4*-C3*-H30 |
| 216 | 16 | 14 | 17 | 1     | 1.095000e+02 | 4.184000e+02 | ; H51-C5*-C4* |
| 217 | 15 | 14 | 16 | 1     | 1.095000e+02 | 2.928800e+02 | ; H50-C5*-H51 |
| 218 | 15 | 14 | 17 | 1     | 1.095000e+02 | 4.184000e+02 | ; H50-C5*-C4* |
| 219 | 14 | 17 | 18 | 1     | 1.095000e+02 | 4.184000e+02 | ; C5*-C4*-H40 |
| 220 | 13 | 14 | 15 | 1     | 1.095000e+02 | 4.184000e+02 | ; 05*-C5*-H50 |
| 221 | 13 | 14 | 16 | 1     | 1.095000e+02 | 4.184000e+02 | ; 05*-C5*-H51 |
| 222 | 38 | 36 | 40 | 1     | 1.095000e+02 | 4.184000e+02 | ; 03*-C3*-C2* |
| 223 | 36 | 40 | 42 | 1     | 1.095000e+02 | 4.184000e+02 | ; C3*-C2*-02* |
| 224 | 32 | 34 | 35 | 1     | 1.110000e+02 | 5.857600e+02 | ; C2-N3-C4    |
| 225 | 31 | 32 | 34 | 1     | 1.291001e+02 | 5.857600e+02 | ; N1-C2-N3    |
| 226 | 28 | 27 | 31 | 1     | 1.193001e+02 | 5.857600e+02 | ; N6-C6-N1    |
| 227 | 27 | 26 | 35 | 1     | 1.173001e+02 | 5.271840e+02 | ; C6-C5-C4    |
| 228 | 27 | 31 | 32 | 1     | 1.186001e+02 | 5.857600e+02 | ; C6-N1-C2    |
| 229 | 26 | 27 | 28 | 1     | 1.235001e+02 | 5.857600e+02 | ; C5-C6-N6    |
| 230 | 26 | 27 | 31 | 1     | 1.173001e+02 | 5.857600e+02 | ; C5-C6-N1    |
| 231 | 26 | 35 | 34 | 1     | 1.277001e+02 | 5.857600e+02 | ; C5-C4-N3    |
| 232 | 25 | 26 | 27 | 1     | 1.324001e+02 | 5.857600e+02 | ; N7-C5-C6    |
| 233 | 25 | 26 | 35 | 1     | 1.104000e+02 | 5.857600e+02 | ; N7-C5-C4    |
| 234 | 25 | 26 | 35 | 1     | 1.104000e+02 | 5.857600e+02 | ; N7-C5-C4    |

|     |               |    |    |    |              |              |                              |
|-----|---------------|----|----|----|--------------|--------------|------------------------------|
| 235 | 23            | 22 | 35 | 1  | 1.054000e+02 | 5.857600e+02 | ; C8-N9-C4                   |
| 236 | 23            | 25 | 26 | 1  | 1.038000e+02 | 5.857600e+02 | ; C8-N7-C5                   |
| 237 | 22            | 20 | 40 | 1  | 1.095000e+02 | 4.184000e+02 | ; N9-C1*-C2*                 |
| 238 | 22            | 23 | 25 | 1  | 1.139000e+02 | 5.857600e+02 | ; N9-C8-N7                   |
| 239 | 22            | 35 | 34 | 1  | 1.262001e+02 | 5.857600e+02 | ; N9-C4-N3                   |
| 240 | 22            | 35 | 26 | 1  | 1.062000e+02 | 5.857600e+02 | ; N9-C4-C5                   |
| 241 | 20            | 22 | 23 | 1  | 1.288001e+02 | 5.857600e+02 | ; C1*-N9-C8                  |
| 242 | 20            | 22 | 35 | 1  | 1.258001e+02 | 5.857600e+02 | ; C1*-N9-C4                  |
| 243 | 20            | 40 | 36 | 1  | 1.095000e+02 | 3.347200e+02 | ; C1*-C2*-C3*                |
| 244 | 20            | 40 | 42 | 1  | 1.095000e+02 | 4.184000e+02 | ; C1*-C2*-O2*                |
| 245 | 19            | 17 | 36 | 1  | 1.095000e+02 | 4.184000e+02 | ; O4*-C4*-C3*                |
| 246 | 19            | 20 | 22 | 1  | 1.095000e+02 | 4.184000e+02 | ; O4*-C1*-N9                 |
| 247 | 19            | 20 | 40 | 1  | 1.095000e+02 | 4.184000e+02 | ; O4*-C1*-C2*                |
| 248 | 17            | 19 | 20 | 1  | 1.095000e+02 | 5.020800e+02 | ; C4*-O4*-C1*                |
| 249 | 17            | 36 | 38 | 1  | 1.095000e+02 | 4.184000e+02 | ; C4*-C3*-O3*                |
| 250 | 17            | 36 | 40 | 1  | 1.095000e+02 | 3.347200e+02 | ; C4*-C3*-C2*                |
| 251 | 14            | 17 | 19 | 1  | 1.095000e+02 | 4.184000e+02 | ; C5*-C4*-O4*                |
| 252 | 14            | 17 | 36 | 1  | 1.095000e+02 | 3.347200e+02 | ; C5*-C4*-C3*                |
| 253 | 13            | 14 | 17 | 1  | 1.095000e+02 | 4.184000e+02 | ; O5*-C5*-C4*                |
| 254 | 12            | 10 | 13 | 1  | 1.082300e+02 | 8.368000e+02 | ; O2A-PA-O5*                 |
| 255 | 11            | 10 | 12 | 1  | 1.199001e+02 | 1.171520e+03 | ; O1A-PA-O2A                 |
| 256 | 11            | 10 | 13 | 1  | 1.082300e+02 | 8.368000e+02 | ; O1A-PA-O5*                 |
| 257 | 10            | 13 | 14 | 1  | 1.205001e+02 | 8.368000e+02 | ; PA-O5*-C5*                 |
| 258 | 9             | 10 | 11 | 1  | 1.082300e+02 | 8.368000e+02 | ; O3A-PA-O1A                 |
| 259 | 9             | 10 | 12 | 1  | 1.082300e+02 | 8.368000e+02 | ; O3A-PA-O2A                 |
| 260 | 9             | 10 | 13 | 1  | 1.026000e+02 | 3.765600e+02 | ; O3A-PA-O5*                 |
| 261 | 8             | 6  | 9  | 1  | 1.082300e+02 | 8.368000e+02 | ; O2B-PB-O3A                 |
| 262 | 7             | 6  | 8  | 1  | 1.199001e+02 | 1.171520e+03 | ; O1B-PB-O2B                 |
| 263 | 7             | 6  | 9  | 1  | 1.082300e+02 | 8.368000e+02 | ; O1B-PB-O3A                 |
| 264 | 6             | 9  | 10 | 1  | 1.500001e+02 | 1.061481e+02 | ; PB-O3A-PA                  |
| 265 | 5             | 6  | 7  | 1  | 1.082300e+02 | 8.368000e+02 | ; O3B-PB-O1B                 |
| 266 | 5             | 6  | 8  | 1  | 1.082300e+02 | 8.368000e+02 | ; O3B-PB-O2B                 |
| 267 | 5             | 6  | 9  | 1  | 1.026000e+02 | 3.765600e+02 | ; O3B-PB-O3A                 |
| 268 | 4             | 2  | 5  | 1  | 1.082300e+02 | 8.368000e+02 | ; O3G-PG-O3B                 |
| 269 | 3             | 2  | 4  | 1  | 1.199001e+02 | 1.171520e+03 | ; O2G-PG-O3G                 |
| 270 | 3             | 2  | 5  | 1  | 1.082300e+02 | 8.368000e+02 | ; O2G-PG-O3B                 |
| 271 | 2             | 5  | 6  | 1  | 1.500001e+02 | 1.061481e+02 | ; PG-O3B-PB                  |
| 272 | 1             | 2  | 3  | 1  | 1.199001e+02 | 1.171520e+03 | ; O1G-PG-O2G                 |
| 273 | 1             | 2  | 4  | 1  | 1.199001e+02 | 1.171520e+03 | ; O1G-PG-O3G                 |
| 274 | 1             | 2  | 5  | 1  | 1.082300e+02 | 8.368000e+02 | ; O1G-PG-O3B                 |
| 275 |               |    |    |    |              |              |                              |
| 276 | [ dihedrals ] |    |    |    |              |              |                              |
| 277 | ;ai           | aj | ak | al | funct        | phi_s        | k_phi mult                   |
| 278 | 41            | 40 | 42 | 43 | 9            | 0.000        | 0.697333 3 ; H20-C2*-O2*-H2' |
| 279 | 39            | 38 | 36 | 40 | 9            | 0.000        | 1.046000 1 ; H3'-O3*-C3*-C2* |
| 280 | 39            | 38 | 36 | 40 | 9            | 0.000        | 0.669440 3 ; H3'-O3*-C3*-C2* |
| 281 | 38            | 36 | 40 | 41 | 9            | 0.000        | 1.046000 1 ; O3*-C3*-C2*-H20 |
| 282 | 38            | 36 | 40 | 41 | 9            | 0.000        | 0.000000 3 ; O3*-C3*-C2*-H20 |
| 283 | 37            | 36 | 38 | 39 | 9            | 0.000        | 0.697333 3 ; H30-C3*-O3*-H3' |
| 284 | 37            | 36 | 40 | 41 | 9            | 0.000        | 0.650844 3 ; H30-C3*-C2*-H20 |
| 285 | 37            | 36 | 40 | 42 | 9            | 0.000        | 1.046000 1 ; H30-C3*-C2*-O2* |
| 286 | 37            | 36 | 40 | 42 | 9            | 0.000        | 0.000000 3 ; H30-C3*-C2*-O2* |
| 287 | 36            | 40 | 42 | 43 | 9            | 0.000        | 1.046000 1 ; C3*-C2*-O2*-H2' |
| 288 | 36            | 40 | 42 | 43 | 9            | 0.000        | 0.669440 3 ; C3*-C2*-O2*-H2' |
| 289 | 33            | 32 | 34 | 35 | 9            | 180.000      | 28.451200 2 ; H2-C2-N3-C4    |
| 290 | 30            | 28 | 27 | 31 | 9            | 180.000      | 10.041600 2 ; H61-N6-C6-N1   |
| 291 | 29            | 28 | 27 | 31 | 9            | 180.000      | 10.041600 2 ; H60-N6-C6-N1   |
| 292 | 27            | 31 | 32 | 33 | 9            | 180.000      | 28.451200 2 ; C6-N1-C2-H2    |
| 293 | 26            | 27 | 28 | 29 | 9            | 180.000      | 10.041600 2 ; C5-C6-N6-H60   |



|     |    |    |    |    |   |         |           |                     |
|-----|----|----|----|----|---|---------|-----------|---------------------|
| 294 | 26 | 27 | 28 | 30 | 9 | 180.000 | 10.041600 | 2 ; C5-C6-N6-H61    |
| 295 | 24 | 23 | 22 | 35 | 9 | 180.000 | 7.112800  | 2 ; H80-C8-N9-C4    |
| 296 | 24 | 23 | 25 | 26 | 9 | 180.000 | 41.840000 | 2 ; H80-C8-N7-C5    |
| 297 | 22 | 20 | 40 | 41 | 9 | 0.000   | 0.650844  | 3 ; N9-C1*-C2*-H20  |
| 298 | 21 | 20 | 22 | 23 | 9 | 0.000   | 0.000000  | 2 ; H10-C1*-N9-C8   |
| 299 | 21 | 20 | 22 | 35 | 9 | 0.000   | 0.000000  | 2 ; H10-C1*-N9-C4   |
| 300 | 21 | 20 | 40 | 36 | 9 | 0.000   | 0.650844  | 3 ; H10-C1*-C2*-C3* |
| 301 | 21 | 20 | 40 | 41 | 9 | 0.000   | 0.650844  | 3 ; H10-C1*-C2*-H20 |
| 302 | 21 | 20 | 40 | 42 | 9 | 0.000   | 0.650844  | 3 ; H10-C1*-C2*-O2* |
| 303 | 20 | 22 | 23 | 24 | 9 | 180.000 | 7.112800  | 2 ; C1*-N9-C8-H80   |
| 304 | 20 | 40 | 36 | 37 | 9 | 0.000   | 0.650844  | 3 ; C1*-C2*-C3*-H30 |
| 305 | 20 | 40 | 42 | 43 | 9 | 0.000   | 1.046000  | 1 ; C1*-C2*-O2*-H2' |
| 306 | 20 | 40 | 42 | 43 | 9 | 0.000   | 0.669440  | 3 ; C1*-C2*-O2*-H2' |
| 307 | 19 | 17 | 36 | 37 | 9 | 0.000   | 1.046000  | 1 ; O4*-C4*-C3*-H30 |
| 308 | 19 | 17 | 36 | 37 | 9 | 0.000   | 0.000000  | 3 ; O4*-C4*-C3*-H30 |
| 309 | 19 | 20 | 40 | 41 | 9 | 0.000   | 1.046000  | 1 ; O4*-C1*-C2*-H20 |
| 310 | 19 | 20 | 40 | 41 | 9 | 0.000   | 0.000000  | 3 ; O4*-C1*-C2*-H20 |
| 311 | 18 | 17 | 19 | 20 | 9 | 0.000   | 1.603867  | 3 ; H40-C4*-O4*-C1* |
| 312 | 18 | 17 | 36 | 37 | 9 | 0.000   | 0.650844  | 3 ; H40-C4*-C3*-H30 |
| 313 | 18 | 17 | 36 | 38 | 9 | 0.000   | 1.046000  | 1 ; H40-C4*-C3*-O3* |
| 314 | 18 | 17 | 36 | 38 | 9 | 0.000   | 0.000000  | 3 ; H40-C4*-C3*-O3* |
| 315 | 18 | 17 | 36 | 40 | 9 | 0.000   | 0.650844  | 3 ; H40-C4*-C3*-C2* |
| 316 | 17 | 19 | 20 | 21 | 9 | 0.000   | 1.603867  | 3 ; C4*-O4*-C1*-H10 |
| 317 | 17 | 36 | 38 | 39 | 9 | 0.000   | 1.046000  | 1 ; C4*-C3*-O3*-H3' |
| 318 | 17 | 36 | 38 | 39 | 9 | 0.000   | 0.669440  | 3 ; C4*-C3*-O3*-H3' |
| 319 | 17 | 36 | 40 | 41 | 9 | 0.000   | 0.650844  | 3 ; C4*-C3*-C2*-H20 |
| 320 | 16 | 14 | 17 | 18 | 9 | 0.000   | 0.650844  | 3 ; H51-C5*-C4*-H40 |
| 321 | 16 | 14 | 17 | 19 | 9 | 0.000   | 1.046000  | 1 ; H51-C5*-C4*-O4* |
| 322 | 16 | 14 | 17 | 19 | 9 | 0.000   | 0.000000  | 3 ; H51-C5*-C4*-O4* |
| 323 | 16 | 14 | 17 | 36 | 9 | 0.000   | 0.650844  | 3 ; H51-C5*-C4*-C3* |
| 324 | 15 | 14 | 17 | 18 | 9 | 0.000   | 0.650844  | 3 ; H50-C5*-C4*-H40 |
| 325 | 15 | 14 | 17 | 19 | 9 | 0.000   | 1.046000  | 1 ; H50-C5*-C4*-O4* |
| 326 | 15 | 14 | 17 | 19 | 9 | 0.000   | 0.000000  | 3 ; H50-C5*-C4*-O4* |
| 327 | 15 | 14 | 17 | 36 | 9 | 0.000   | 0.650844  | 3 ; H50-C5*-C4*-C3* |
| 328 | 14 | 17 | 36 | 37 | 9 | 0.000   | 0.650844  | 3 ; C5*-C4*-C3*-H30 |
| 329 | 13 | 14 | 17 | 18 | 9 | 0.000   | 1.046000  | 1 ; O5*-C5*-C4*-H40 |
| 330 | 13 | 14 | 17 | 18 | 9 | 0.000   | 0.000000  | 3 ; O5*-C5*-C4*-H40 |
| 331 | 10 | 13 | 14 | 15 | 9 | 0.000   | 0.146440  | 3 ; PA-O5*-C5*-H50  |
| 332 | 10 | 13 | 14 | 16 | 9 | 0.000   | 0.146440  | 3 ; PA-O5*-C5*-H51  |
| 333 | 31 | 34 | 32 | 33 | 4 | 180.000 | 4.602400  | 2 ; N1-N3-C2-H2     |
| 334 | 27 | 29 | 28 | 30 | 4 | 180.000 | 4.184000  | 2 ; C6-H60-N6-H61   |
| 335 | 22 | 25 | 23 | 24 | 4 | 180.000 | 4.602400  | 2 ; N9-N7-C8-H80    |
| 336 | 38 | 36 | 40 | 42 | 9 | 0.000   | 4.916200  | 2 ; O3*-C3*-C2*-O2* |
| 337 | 38 | 36 | 40 | 42 | 9 | 0.000   | 0.602496  | 3 ; O3*-C3*-C2*-O2* |
| 338 | 35 | 22 | 20 | 40 | 9 | 0.000   | 0.000000  | 2 ; C4-N9-C1*-C2*   |
| 339 | 31 | 27 | 26 | 35 | 9 | 180.000 | 14.644000 | 2 ; N1-C6-C5-C4     |
| 340 | 31 | 32 | 34 | 35 | 9 | 180.000 | 28.451200 | 2 ; N1-C2-N3-C4     |
| 341 | 28 | 27 | 26 | 35 | 9 | 180.000 | 14.644000 | 2 ; N6-C6-C5-C4     |
| 342 | 28 | 27 | 31 | 32 | 9 | 180.000 | 20.083200 | 2 ; N6-C6-N1-C2     |
| 343 | 27 | 26 | 35 | 34 | 9 | 180.000 | 22.802800 | 2 ; C6-C5-C4-N3     |
| 344 | 27 | 31 | 32 | 34 | 9 | 180.000 | 28.451200 | 2 ; C6-N1-C2-N3     |
| 345 | 26 | 27 | 31 | 32 | 9 | 180.000 | 20.083200 | 2 ; C5-C6-N1-C2     |
| 346 | 26 | 35 | 34 | 32 | 9 | 180.000 | 17.363600 | 2 ; C5-C4-N3-C2     |
| 347 | 25 | 23 | 22 | 35 | 9 | 180.000 | 7.112800  | 2 ; N7-C8-N9-C4     |
| 348 | 25 | 26 | 27 | 28 | 9 | 180.000 | 14.644000 | 2 ; N7-C5-C6-N6     |
| 349 | 25 | 26 | 27 | 31 | 9 | 180.000 | 14.644000 | 2 ; N7-C5-C6-N1     |
| 350 | 25 | 26 | 35 | 34 | 9 | 180.000 | 22.802800 | 2 ; N7-C5-C4-N3     |
| 351 | 23 | 22 | 20 | 40 | 9 | 0.000   | 0.000000  | 2 ; C8-N9-C1*-C2*   |
| 352 | 23 | 22 | 35 | 34 | 9 | 180.000 | 6.903600  | 2 ; C8-N9-C4-N3     |

|     |    |    |    |    |   |         |           |                     |
|-----|----|----|----|----|---|---------|-----------|---------------------|
| 353 | 23 | 22 | 35 | 26 | 9 | 180.000 | 6.903600  | 2 ; C8-N9-C4-C5     |
| 354 | 23 | 25 | 26 | 27 | 9 | 180.000 | 10.669200 | 2 ; C8-N7-C5-C6     |
| 355 | 23 | 25 | 26 | 35 | 9 | 180.000 | 10.669200 | 2 ; C8-N7-C5-C4     |
| 356 | 22 | 20 | 40 | 36 | 9 | 0.000   | 0.650844  | 3 ; N9-C1*-C2*-C3*  |
| 357 | 22 | 20 | 40 | 42 | 9 | 0.000   | 0.650844  | 3 ; N9-C1*-C2*-02*  |
| 358 | 22 | 23 | 25 | 26 | 9 | 180.000 | 41.840000 | 2 ; N9-C8-N7-C5     |
| 359 | 22 | 35 | 34 | 32 | 9 | 180.000 | 17.363600 | 2 ; N9-C4-N3-C2     |
| 360 | 22 | 35 | 26 | 25 | 9 | 180.000 | 22.802800 | 2 ; N9-C4-C5-N7     |
| 361 | 22 | 35 | 26 | 27 | 9 | 180.000 | 22.802800 | 2 ; N9-C4-C5-C6     |
| 362 | 20 | 19 | 17 | 36 | 9 | 180.000 | 0.418400  | 2 ; C1*-04*-C4*-C3* |
| 363 | 20 | 19 | 17 | 36 | 9 | 0.000   | 1.602472  | 3 ; C1*-04*-C4*-C3* |
| 364 | 20 | 22 | 23 | 25 | 9 | 180.000 | 7.112800  | 2 ; C1*-N9-C8-N7    |
| 365 | 20 | 22 | 35 | 34 | 9 | 180.000 | 6.903600  | 2 ; C1*-N9-C4-N3    |
| 366 | 20 | 22 | 35 | 26 | 9 | 180.000 | 6.903600  | 2 ; C1*-N9-C4-C5    |
| 367 | 20 | 40 | 36 | 38 | 9 | 0.000   | 0.650844  | 3 ; C1*-C2*-C3*-03* |
| 368 | 19 | 17 | 36 | 38 | 9 | 0.000   | 4.916200  | 2 ; 04*-C4*-C3*-03* |
| 369 | 19 | 17 | 36 | 38 | 9 | 0.000   | 0.602496  | 3 ; 04*-C4*-C3*-03* |
| 370 | 19 | 17 | 36 | 40 | 9 | 0.000   | 0.650844  | 3 ; 04*-C4*-C3*-C2* |
| 371 | 19 | 20 | 22 | 23 | 9 | 0.000   | 10.460000 | 1 ; 04*-C1*-N9-C8   |
| 372 | 19 | 20 | 22 | 23 | 9 | 0.000   | 0.000000  | 2 ; 04*-C1*-N9-C8   |
| 373 | 19 | 20 | 22 | 35 | 9 | 0.000   | 0.000000  | 2 ; 04*-C1*-N9-C4   |
| 374 | 19 | 20 | 40 | 36 | 9 | 0.000   | 0.650844  | 3 ; 04*-C1*-C2*-C3* |
| 375 | 19 | 20 | 40 | 42 | 9 | 0.000   | 4.916200  | 2 ; 04*-C1*-C2*-02* |
| 376 | 19 | 20 | 40 | 42 | 9 | 0.000   | 0.602496  | 3 ; 04*-C1*-C2*-02* |
| 377 | 17 | 19 | 20 | 22 | 9 | 0.000   | 2.719600  | 2 ; C4*-04*-C1*-N9  |
| 378 | 17 | 19 | 20 | 22 | 9 | 0.000   | 1.602472  | 3 ; C4*-04*-C1*-N9  |
| 379 | 17 | 19 | 20 | 40 | 9 | 180.000 | 0.418400  | 2 ; C4*-04*-C1*-C2* |
| 380 | 17 | 19 | 20 | 40 | 9 | 0.000   | 1.602472  | 3 ; C4*-04*-C1*-C2* |
| 381 | 17 | 36 | 40 | 42 | 9 | 0.000   | 0.650844  | 3 ; C4*-C3*-C2*-02* |
| 382 | 17 | 36 | 40 | 20 | 9 | 180.000 | 0.836800  | 1 ; C4*-C3*-C2*-C1* |
| 383 | 17 | 36 | 40 | 20 | 9 | 180.000 | 1.046000  | 2 ; C4*-C3*-C2*-C1* |
| 384 | 17 | 36 | 40 | 20 | 9 | 0.000   | 0.753120  | 3 ; C4*-C3*-C2*-C1* |
| 385 | 14 | 17 | 19 | 20 | 9 | 180.000 | 0.418400  | 2 ; C5*-C4*-04*-C1* |
| 386 | 14 | 17 | 19 | 20 | 9 | 0.000   | 1.602472  | 3 ; C5*-C4*-04*-C1* |
| 387 | 14 | 17 | 36 | 38 | 9 | 0.000   | 0.650844  | 3 ; C5*-C4*-C3*-03* |
| 388 | 14 | 17 | 36 | 40 | 9 | 180.000 | 0.836800  | 1 ; C5*-C4*-C3*-C2* |
| 389 | 14 | 17 | 36 | 40 | 9 | 180.000 | 1.046000  | 2 ; C5*-C4*-C3*-C2* |
| 390 | 14 | 17 | 36 | 40 | 9 | 0.000   | 0.753120  | 3 ; C5*-C4*-C3*-C2* |
| 391 | 13 | 14 | 17 | 19 | 9 | 0.000   | 4.916200  | 2 ; 05*-C5*-C4*-04* |
| 392 | 13 | 14 | 17 | 19 | 9 | 0.000   | 0.602496  | 3 ; 05*-C5*-C4*-04* |
| 393 | 13 | 14 | 17 | 36 | 9 | 0.000   | 0.650844  | 3 ; 05*-C5*-C4*-C3* |
| 394 | 12 | 10 | 13 | 14 | 9 | 0.000   | -1.698704 | 2 ; 02A-PA-05*-C5*  |
| 395 | 12 | 10 | 13 | 14 | 9 | 0.000   | 2.466468  | 3 ; 02A-PA-05*-C5*  |
| 396 | 11 | 10 | 13 | 14 | 9 | 0.000   | -1.698704 | 2 ; 01A-PA-05*-C5*  |
| 397 | 11 | 10 | 13 | 14 | 9 | 0.000   | 2.466468  | 3 ; 01A-PA-05*-C5*  |
| 398 | 10 | 13 | 14 | 17 | 9 | 0.000   | 1.603867  | 3 ; PA-05*-C5*-C4*  |
| 399 | 9  | 10 | 13 | 14 | 9 | 0.000   | -6.527040 | 1 ; 03A-PA-05*-C5*  |
| 400 | 8  | 6  | 9  | 10 | 9 | 0.000   | -1.483228 | 2 ; 02B-PB-03A-PA   |
| 401 | 7  | 6  | 9  | 10 | 9 | 0.000   | -1.483228 | 2 ; 01B-PB-03A-PA   |
| 402 | 6  | 9  | 10 | 11 | 9 | 0.000   | -1.483228 | 2 ; PB-03A-PA-01A   |
| 403 | 6  | 9  | 10 | 12 | 9 | 0.000   | -1.483228 | 2 ; PB-03A-PA-02A   |
| 404 | 6  | 9  | 10 | 13 | 9 | 0.000   | 3.753048  | 1 ; PB-03A-PA-05*   |
| 405 | 5  | 6  | 9  | 10 | 9 | 0.000   | 3.753048  | 1 ; 03B-PB-03A-PA   |
| 406 | 4  | 2  | 5  | 6  | 9 | 0.000   | -0.355640 | 3 ; 03G-PG-03B-PB   |
| 407 | 3  | 2  | 5  | 6  | 9 | 0.000   | -0.355640 | 3 ; 02G-PG-03B-PB   |
| 408 | 2  | 5  | 6  | 7  | 9 | 0.000   | -1.483228 | 2 ; PG-03B-PB-01B   |
| 409 | 2  | 5  | 6  | 8  | 9 | 0.000   | -1.483228 | 2 ; PG-03B-PB-02B   |
| 410 | 2  | 5  | 6  | 9  | 9 | 0.000   | 3.753048  | 1 ; PG-03B-PB-03A   |
| 411 | 1  | 2  | 5  | 6  | 9 | 0.000   | -0.355640 | 3 ; 01G-PG-03B-PB   |

|     |    |    |    |    |   |         |          |                  |
|-----|----|----|----|----|---|---------|----------|------------------|
| 412 | 26 | 28 | 27 | 31 | 4 | 180.000 | 4.602400 | 2 ; C5-N6-C6-N1  |
| 413 | 35 | 23 | 22 | 20 | 4 | 180.000 | 4.184000 | 2 ; C4-C8-N9-C1* |

## Ions topology file ions.itp

```
1 [ moleculetype ]
2 ; molname      nrexcl
3 CL              1
4
5 [ atoms ]
6 ; id   at type      res nr  residu name   at name  cg nr  charge
7 1     Cl              1      CL           CL       1     -0.70000
8
9
10 [ moleculetype ]
11 ; molname      nrexcl
12 NA              1
13
14 [ atoms ]
15 ; id   at type      res nr  residu name   at name  cg nr  charge
16 1     Na              1      NA           NA       1     0.70000
```

## Water topology file tip4p2005.itp

```
1 ;
2 ; Note the strange order of atoms to make it faster in gromacs.
3 ;
4 [ moleculetype ]
5 ; molname nrexcl
6 SOL 2
7
8 [ atoms ]
9 ; id at type res nr residu name at name cg nr charge
10 1 OWAT 1 SOL OW 1 0.0
11 2 HWAT 1 SOL HW1 1 0.5564
12 3 HWAT 1 SOL HW2 1 0.5564
13 4 MWAT 1 SOL MW 1 -1.1128
14
15 #ifndef FLEXIBLE
16 [ settles ]
17 ; OW funct doh dhh
18 1 1 0.09572 0.15139
19 #else
20 [ bonds ]
21 ; i j funct length force.c.
22 1 2 1 0.09572 502416.0
23 1 3 1 0.09572 502416.0
24
25 [ angles ]
26 ; i j k funct angle force.c.
27 2 1 3 1 104.52 628.02 104.52 628.02
28 #endif
29
30 [ exclusions ]
31 1 2 3 4
32 2 1 3 4
33 3 1 2 4
34 4 1 2 3
35
36 ; The position of the virtual site is computed as follows:
37 ;
38 ; 0
39 ;
40 ; D
41 ;
42 ; H H
43 ;
44 ; const = distance (OD) / [ cos (angle(DOH)) * distance (OH) ]
45 ; 0.01546 nm / [ cos (52.26 deg) * 0.09572 nm ]
46
47 ; Vsite pos x4 = x1 + a*(x2-x1) + b*(x3-x1)
48
49 [ virtual_sites3 ]
50 ; Vsite from funct a b
51 4 1 2 3 1 0.13193828 0.13193828
```
